# Supplementary material for: Wie informieren sich die Menschen in Deutschland zum Thema Gesundheit? Erkenntnisse aus der ersten Welle von HINTS Germany
Source: Springer Nature journal article supplement (doi:10.1007/s00103-020-03192-x), 2020-07-14
Supplement: MOESM1 [file 18181548]

Elektronisches Zusatzmaterial zum Beitrag:

## **Wie informieren sich die Menschen in Deutschland zum Thema Gesundheit? Erkenntnisse aus der ersten Welle von HINTS Germany**

Eva Baumann<sup>1</sup>, Fabian Czerwinski<sup>1</sup>, Magdalena Rosset<sup>1</sup>, Markus Seelig<sup>2</sup>, Ralf Suhr<sup>2</sup>

<sup>1</sup> Institut für Journalistik und Kommunikationsforschung, Hochschule für Musik, Theater und Medien Hannover, Hannover, Deutschland

<sup>2</sup> Stiftung Gesundheitswissen, Berlin, Deutschland

### **Korrespondenzadresse:**

Dr. Fabian Czerwinski

Institut für Journalistik und Kommunikationsforschung,

Hochschule für Musik, Theater und Medien Hannover

Expo Plaza 12

30539 Hannover

fabian.czerwinski@ijk.hmtm-hannover.de

Inhalt: Konfidenzintervalle zu den Daten in allen Abbildungen

**Tab. A.1 Konfidenzintervalle zu den Daten in allen Abbildungen**

Tab. A.1: Konfidenzintervalle zu den Daten in allen Abbildungen

| <b>Abb. 1 (Gesundheit-Informationssuche nach Bundesland)</b>                               |                           | 95 % Konfidenz-Intervall |               |              |
|--------------------------------------------------------------------------------------------|---------------------------|--------------------------|---------------|--------------|
| Bundesland                                                                                 | Anteil „ja“ %             | Untere Grenze            | Obere Grenze  |              |
| Schleswig-Holstein                                                                         | 75,8                      | 63,5                     | 88,1          |              |
| Hamburg                                                                                    | 75,8                      | 60,8                     | 90,8          |              |
| Niedersachsen                                                                              | 75,9                      | 69,1                     | 82,8          |              |
| Bremen                                                                                     | 79,2                      | 55,5                     | 104,3         |              |
| Nordrhein-Westfalen                                                                        | 72,0                      | 66,7                     | 77,3          |              |
| Hessen                                                                                     | 75,2                      | 66,9                     | 83,6          |              |
| Rheinland-Pfalz                                                                            | 77,1                      | 67,0                     | 87,1          |              |
| Baden-Württemberg                                                                          | 78,7                      | 72,7                     | 84,7          |              |
| Bayern                                                                                     | 71,5                      | 65,4                     | 77,6          |              |
| Saarland                                                                                   | 57,1                      | 32,6                     | 81,1          |              |
| Berlin                                                                                     | 72,6                      | 62,5                     | 82,7          |              |
| Brandenburg                                                                                | 58,6                      | 45,1                     | 72,2          |              |
| Mecklenburg-Vorpommern                                                                     | 67,9                      | 49,1                     | 86,7          |              |
| Sachsen                                                                                    | 75,7                      | 65,8                     | 85,6          |              |
| Sachsen-Anhalt                                                                             | 89,7                      | 81,2                     | 98,2          |              |
| Thüringen                                                                                  | 77,6                      | 64,7                     | 91,1          |              |
| Gesamt                                                                                     | 74,0                      | 71,7                     | 76,3          |              |
| <b>Abb. 2 (Gesundheit-Informationssuche nach Geschlecht und sozio-ökonomischem Status)</b> |                           | 95 % Konfidenz-Intervall |               |              |
| Geschlecht                                                                                 | Sozio-ökonomischer Status | Anteil „ja“              | Untere Grenze | Obere Grenze |
| weiblich                                                                                   | Niedrig                   | 69,0                     | 59,2          | 78,8         |
|                                                                                            | Mittel                    | 83,1                     | 78,8          | 87,3         |
|                                                                                            | Hoch                      | 88,6                     | 85,3          | 91,9         |
|                                                                                            | Gesamt                    | 81,1                     | 77,6          | 84,7         |
| männlich                                                                                   | Niedrig                   | 55,1                     | 43,4          | 66,8         |
|                                                                                            | Mittel                    | 66,9                     | 61,9          | 72,0         |
|                                                                                            | Hoch                      | 78,7                     | 75,1          | 82,3         |
|                                                                                            | Gesamt                    | 68,5                     | 65,2          | 71,9         |
| Total                                                                                      |                           | 74,0                     | 71,7          | 76,3         |
| <b>Abb. 3 (Schwierigkeiten bei der Informationssuche)</b>                                  |                           | 95 % Konfidenz-Intervall |               |              |
| Aussage                                                                                    | Ausprägung                | Anteil %                 | Untere Grenze | Obere Grenze |
| Es war sehr aufwändig, an die benötigten Informationen zu kommen.                          | Stimme gar nicht zu       | 36,5                     | 33,9          | 39,2         |
|                                                                                            | Stimme eher nicht zu      | 30,0                     | 27,6          | 32,5         |
|                                                                                            | Stimme eher zu            | 22,1                     | 19,8          | 24,4         |
|                                                                                            | Stimme voll und ganz zu   | 11,3                     | 9,5           | 13,1         |
| Die Suche nach Informationen hat Sie frustriert.                                           | Stimme gar nicht zu       | 55,1                     | 52,4          | 57,9         |
|                                                                                            | Stimme eher nicht zu      | 25,8                     | 23,6          | 28,4         |
|                                                                                            | Stimme eher zu            | 12,1                     | 10,1          | 13,9         |
|                                                                                            | Stimme voll und ganz zu   | 6,9                      | 5,4           | 8,3          |
| Sie waren beunruhigt wegen der Qualität der Informationen.                                 | Stimme gar nicht zu       | 44,9                     | 42,4          | 47,7         |
|                                                                                            | Stimme eher nicht zu      | 28,4                     | 26,0          | 30,9         |
|                                                                                            | Stimme eher zu            | 17,7                     | 15,5          | 19,8         |
|                                                                                            | Stimme voll und ganz zu   | 9,0                      | 7,1           | 10,9         |

|                                                                                               |                         |            |                          |              |
|-----------------------------------------------------------------------------------------------|-------------------------|------------|--------------------------|--------------|
| Die von Ihnen gefundenen Informationen waren schwer zu verstehen.                             | Stimme gar nicht zu     | 47,1       | 44,3                     | 49,8         |
|                                                                                               | Stimme eher nicht zu    | 30,0       | 27,6                     | 32,7         |
|                                                                                               | Stimme eher zu          | 15,6       | 13,5                     | 17,7         |
|                                                                                               | Stimme voll und ganz zu | 7,3        | 5,7                      | 8,9          |
| <b>Abb. 4 (Bevorzugte Quellen und Vertrauen)</b>                                              |                         |            | 95 % Konfidenz-Intervall |              |
| Quellenpräferenz                                                                              |                         | Anteil %   | Untere Grenze            | Obere Grenze |
| Ärzt*innen & Co.                                                                              |                         | 69,1       | 66,8                     | 71,3         |
| Internet                                                                                      |                         | 20,7       | 18,8                     | 22,6         |
| Familie, Freund*innen, Kolleg*innen                                                           |                         | 5,4        | 3,7                      | 7,1          |
| Vertrauen                                                                                     |                         | Mittelwert | Untere Grenze            | Obere Grenze |
| Ärzt*innen & Co.                                                                              |                         | 4,05       | 3,99                     | 4,10         |
| Internet                                                                                      |                         | 2,46       | 2,40                     | 2,52         |
| Familie, Freund*innen, Kolleg*innen                                                           |                         | 3,04       | 2,98                     | 3,10         |
| <b>Abb. 5 (Gesundheitszustand und informationsbezogene Selbstwirksamkeitserwartung – SWE)</b> |                         |            | 95 % Konfidenz-Intervall |              |
| Gesundheitszustand                                                                            | SWE                     | Anteil %   | Untere Grenze            | Obere Grenze |
| Schlecht / sehr schlecht                                                                      | Überhaupt nicht         | 7,9        | 2,9                      | 13,0         |
|                                                                                               | Wenig                   | 14,1       | 5,6                      | 22,7         |
|                                                                                               | Einigermaßen            | 29,4       | 20,5                     | 38,4         |
|                                                                                               | Sehr                    | 19,2       | 10,7                     | 27,6         |
|                                                                                               | Absolut                 | 29,4       | 19,9                     | 38,8         |
| Mittelmäßig                                                                                   | Überhaupt nicht         | 2,5        | 1,0                      | 3,9          |
|                                                                                               | Wenig                   | 12,5       | 8,7                      | 16,3         |
|                                                                                               | Einigermaßen            | 39,6       | 34,3                     | 45,0         |
|                                                                                               | Sehr                    | 18,4       | 14,5                     | 22,2         |
|                                                                                               | Absolut                 | 26,9       | 22,2                     | 31,7         |
| Gut / sehr gut                                                                                | Überhaupt nicht         | 3,2        | 2,2                      | 4,2          |
|                                                                                               | Wenig                   | 10,3       | 8,6                      | 12,1         |
|                                                                                               | Einigermaßen            | 30,6       | 27,9                     | 33,2         |
|                                                                                               | Sehr                    | 25,6       | 23,2                     | 28,0         |
|                                                                                               | Absolut                 | 30,4       | 27,7                     | 33,0         |
